# Supplementary material
Source: PubMed Central journal article supplement (PMC7818227)
Supplement: ac0c03134_si_002.pdf [file ac0c03134_si_002.pdf]

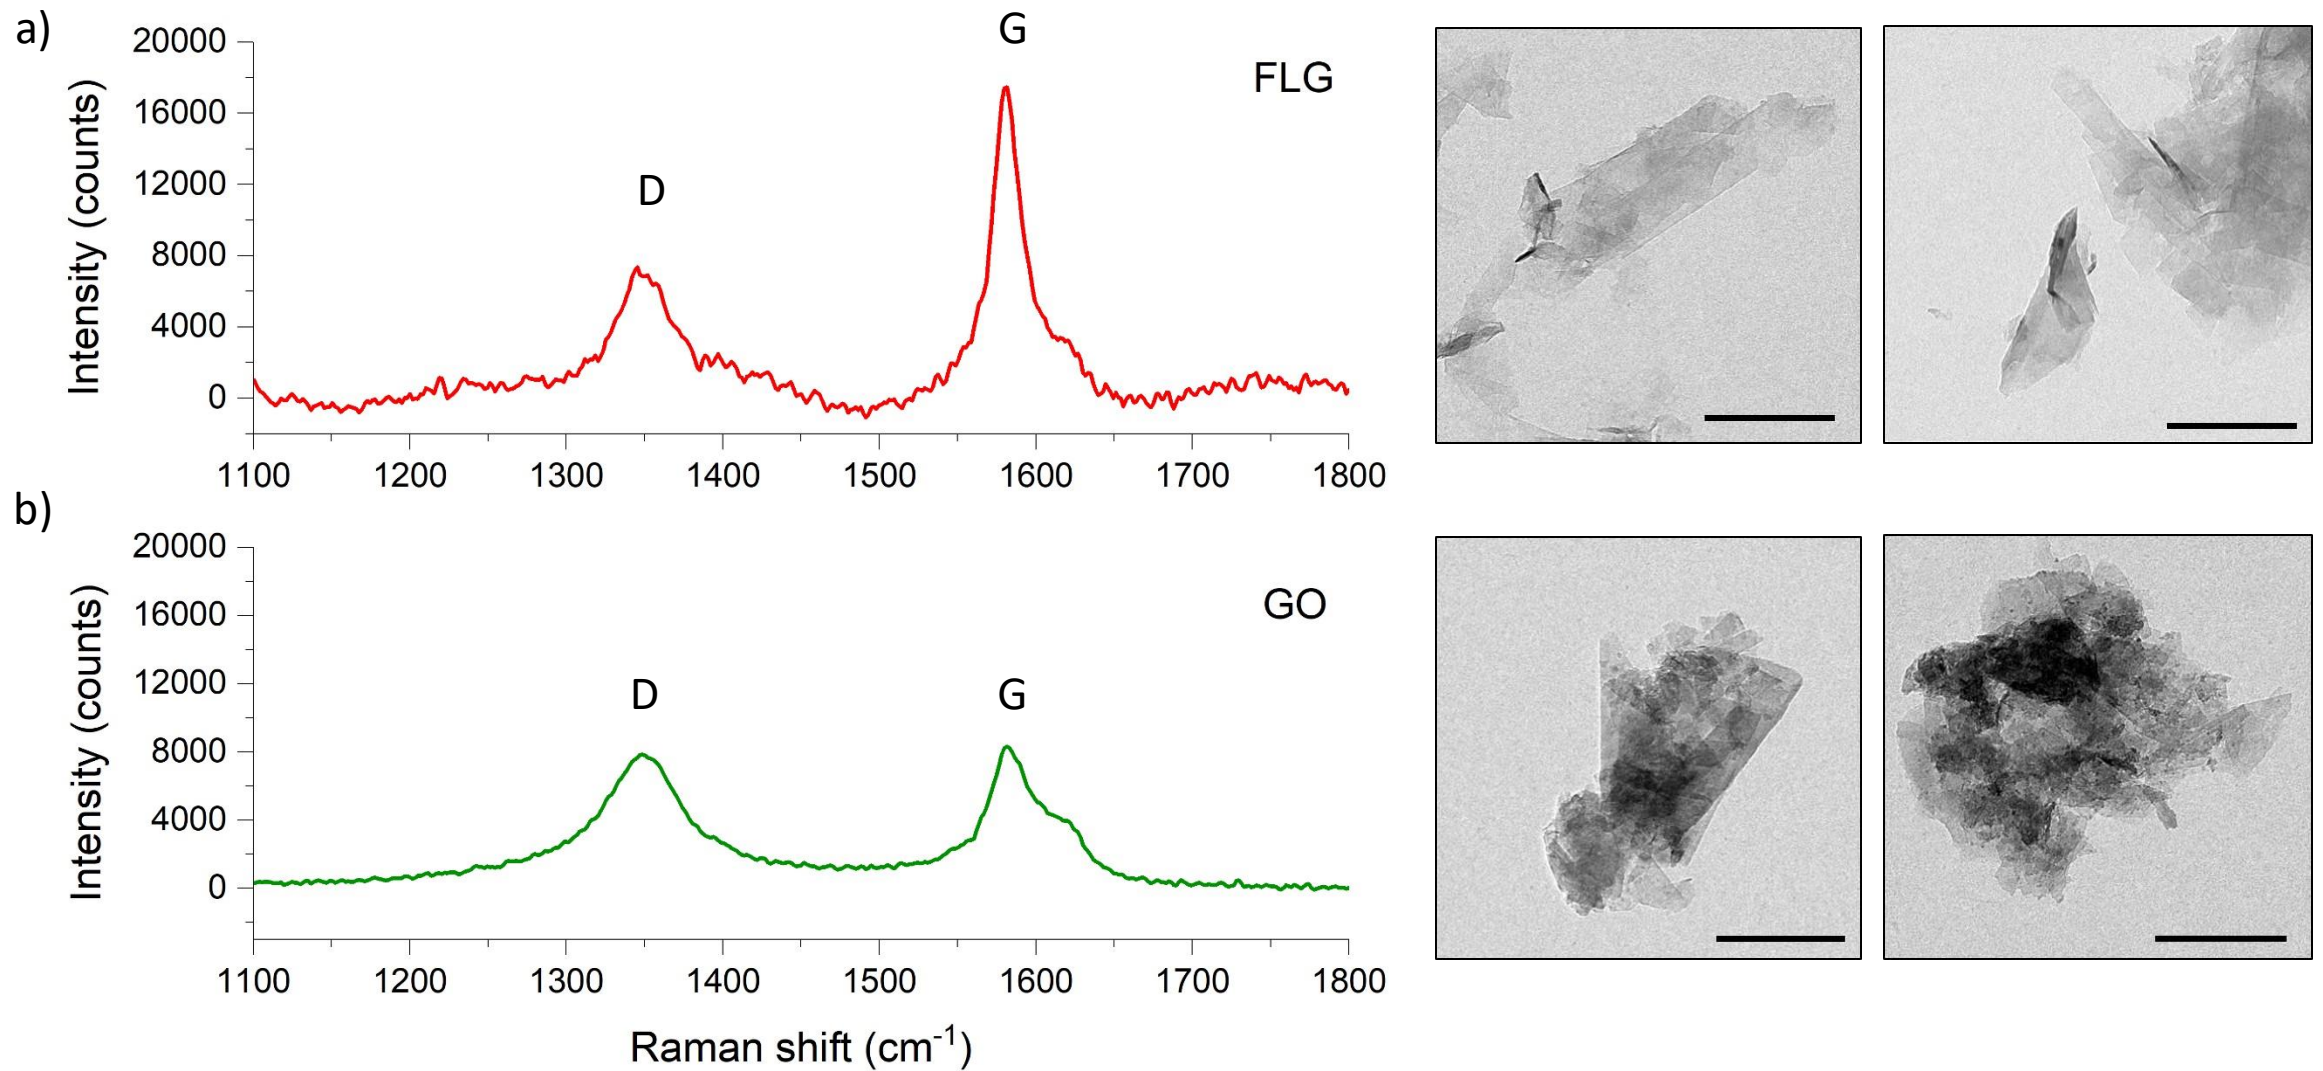

**Figure S1:** Raman spectra (left) and representative TEM micrographs (right, scale bars = 250 nm) for a) FLG and b) GO in water. The Raman spectra, using laser excitation at 532 nm, show the typical D ( $\sim 1350\text{ cm}^{-1}$ ) and G ( $\sim 1580\text{ cm}^{-1}$ ) peaks with different ratio, as expected for FLG and GO.

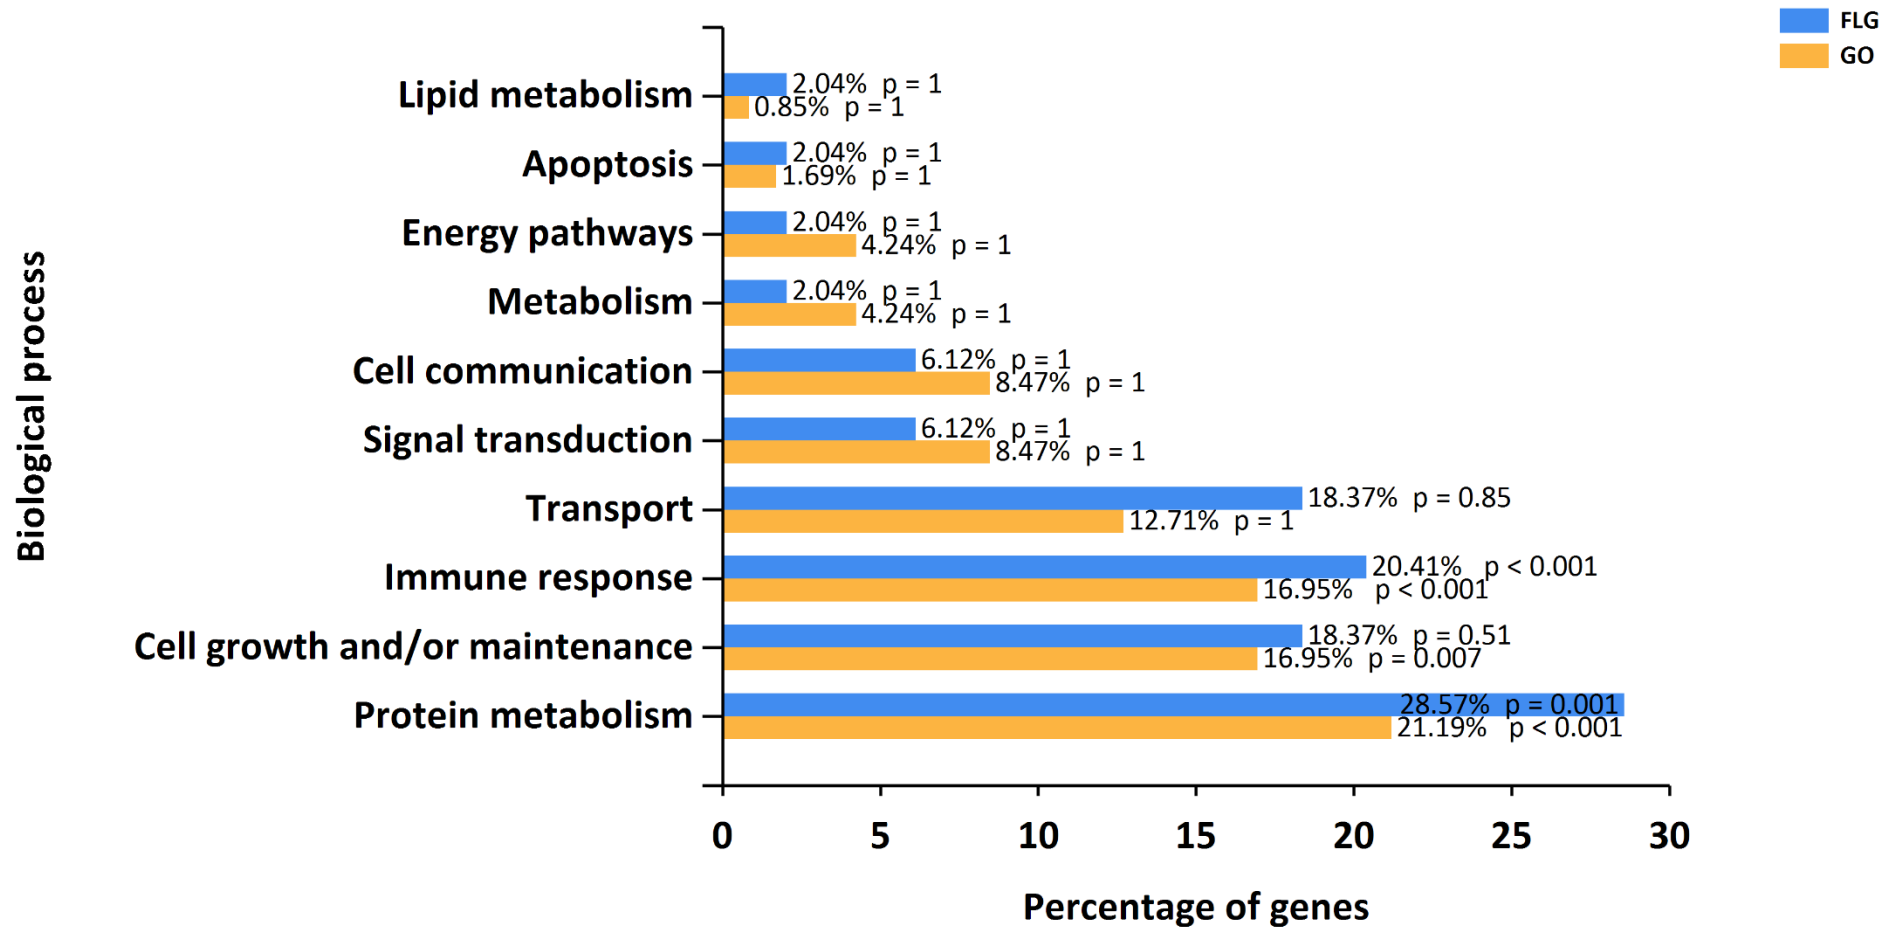

**Figure S2.** Gene enrichment analysis reporting the 10 most significantly altered biological processes enriched in FLG and GO protein corona

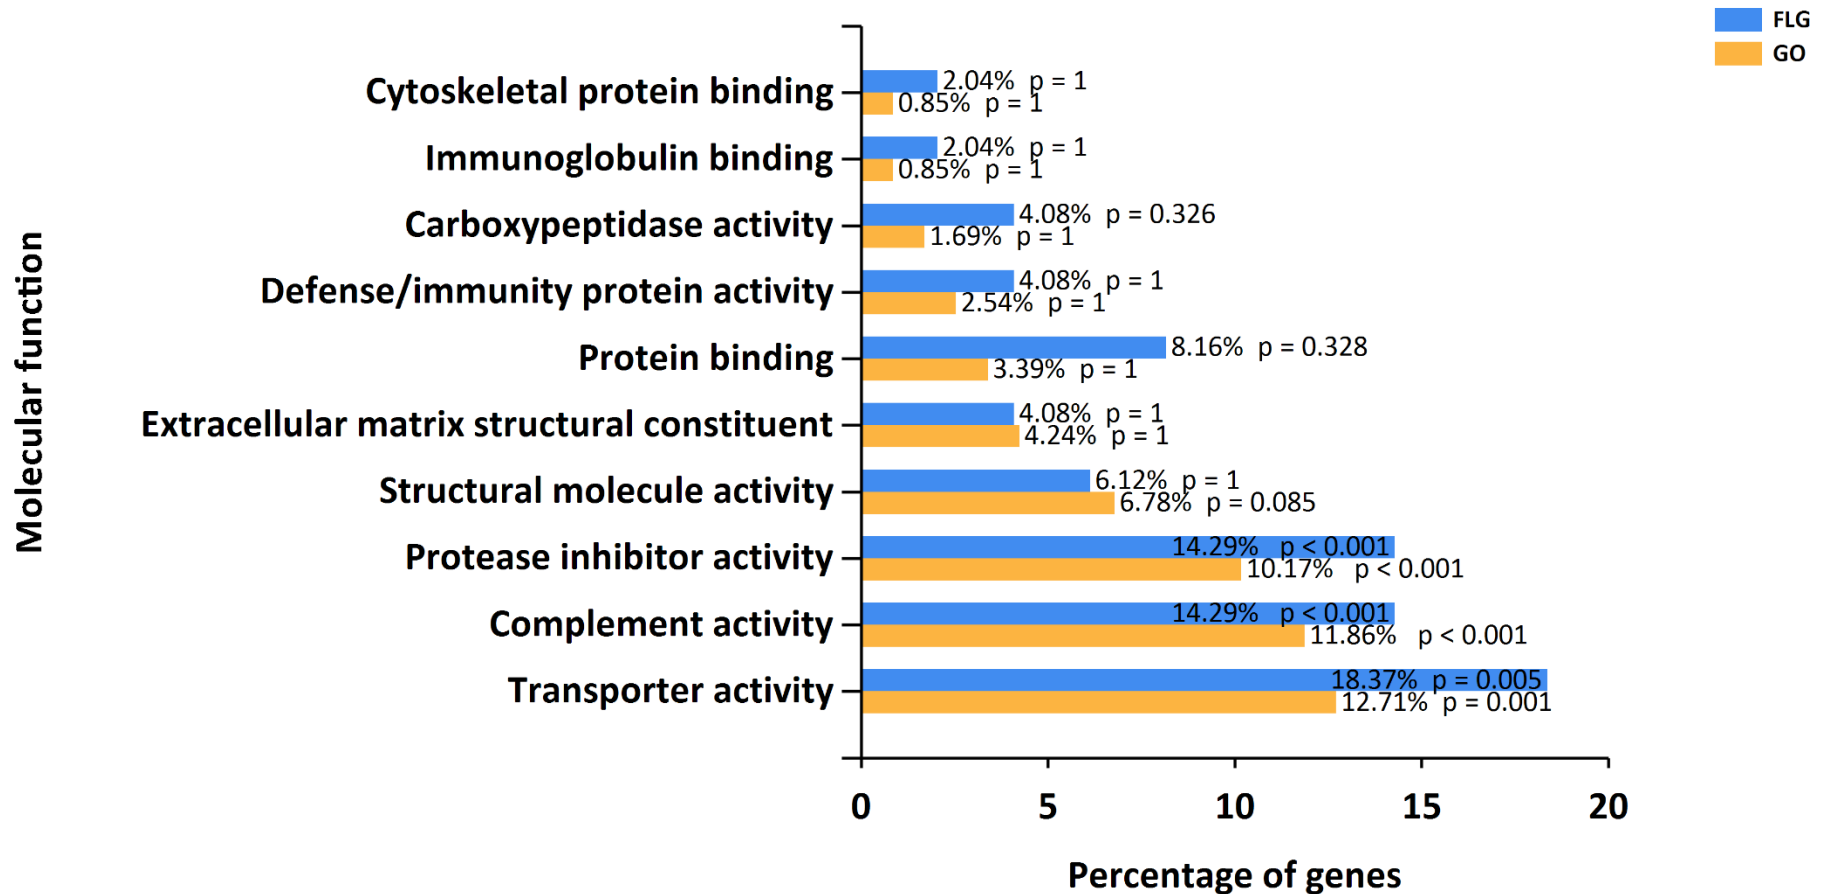

**Figure S3.** Gene enrichment analysis reporting the 10 most significantly altered molecular functions enriched in FLG and GO protein corona

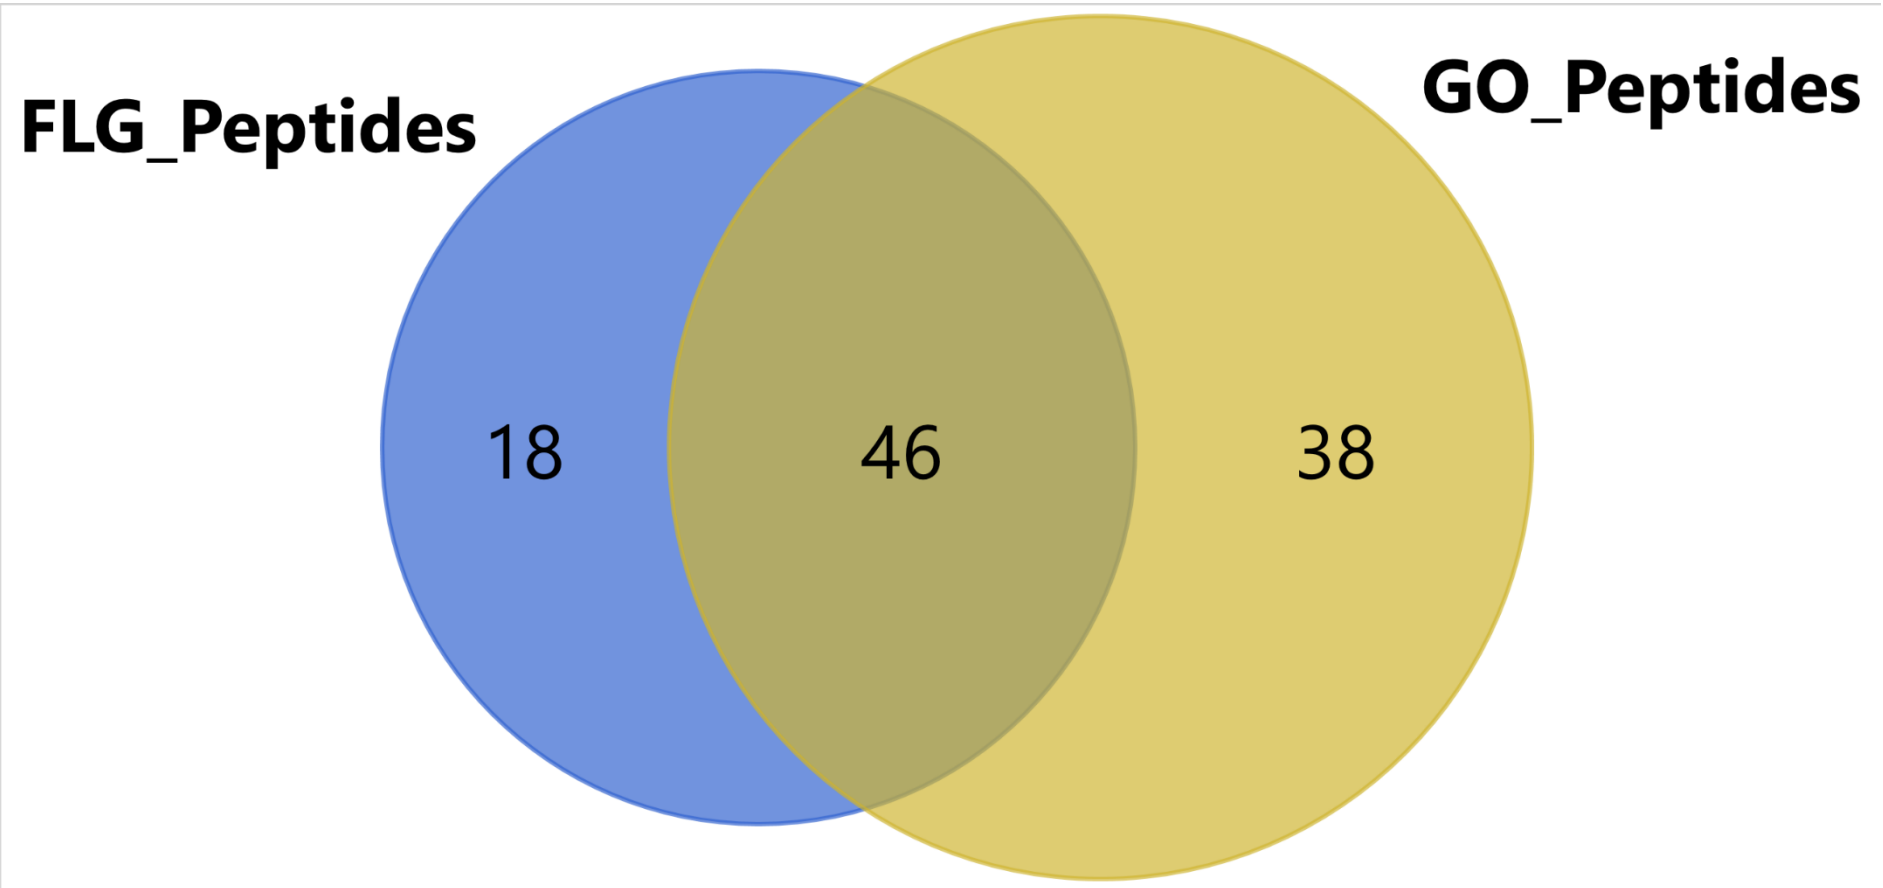

**Figure S4.** Venn diagram for the assigned peptides

**A**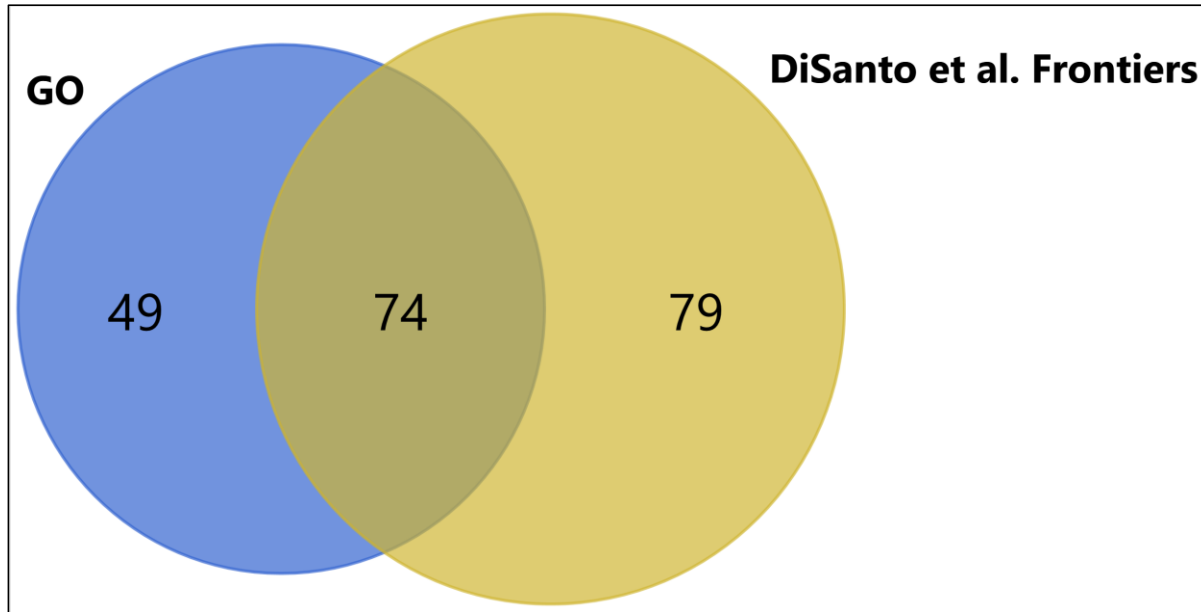**B**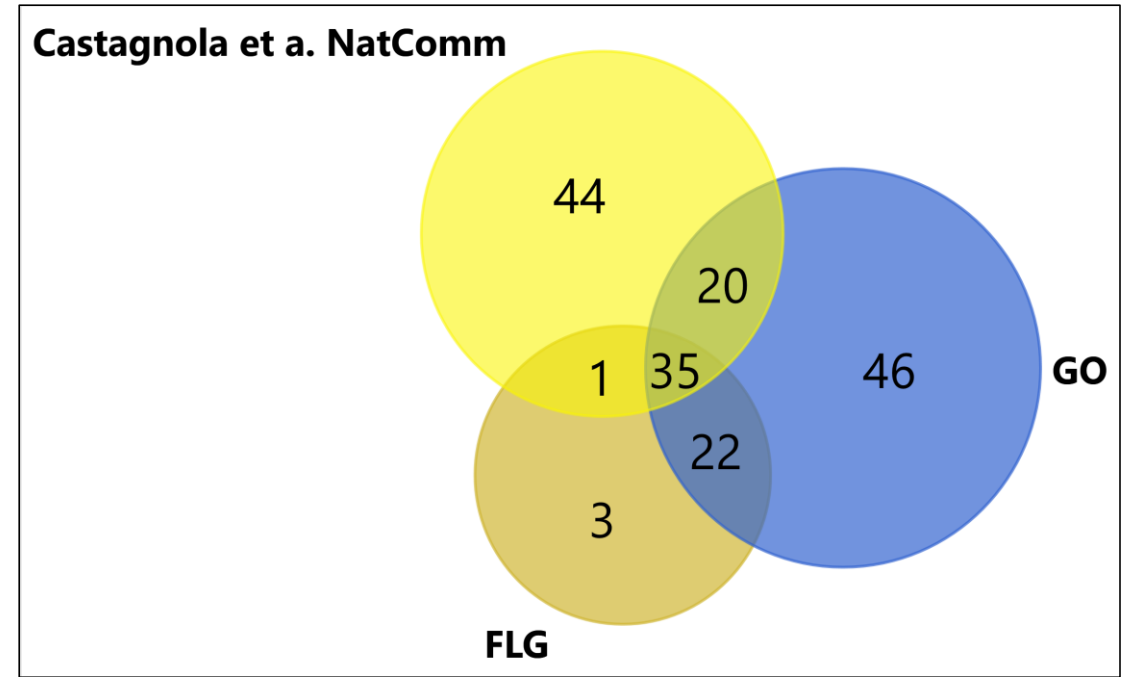

**Figure S5.** Comparison of the protein corona composition data generated by our work with data from two other papers published: Di Santo et al. *Front.Bioeng.Biotechnol.* 2020 (Panel A) and Castagnola et al. *Nat.Comm.* 2018 (Panel B).

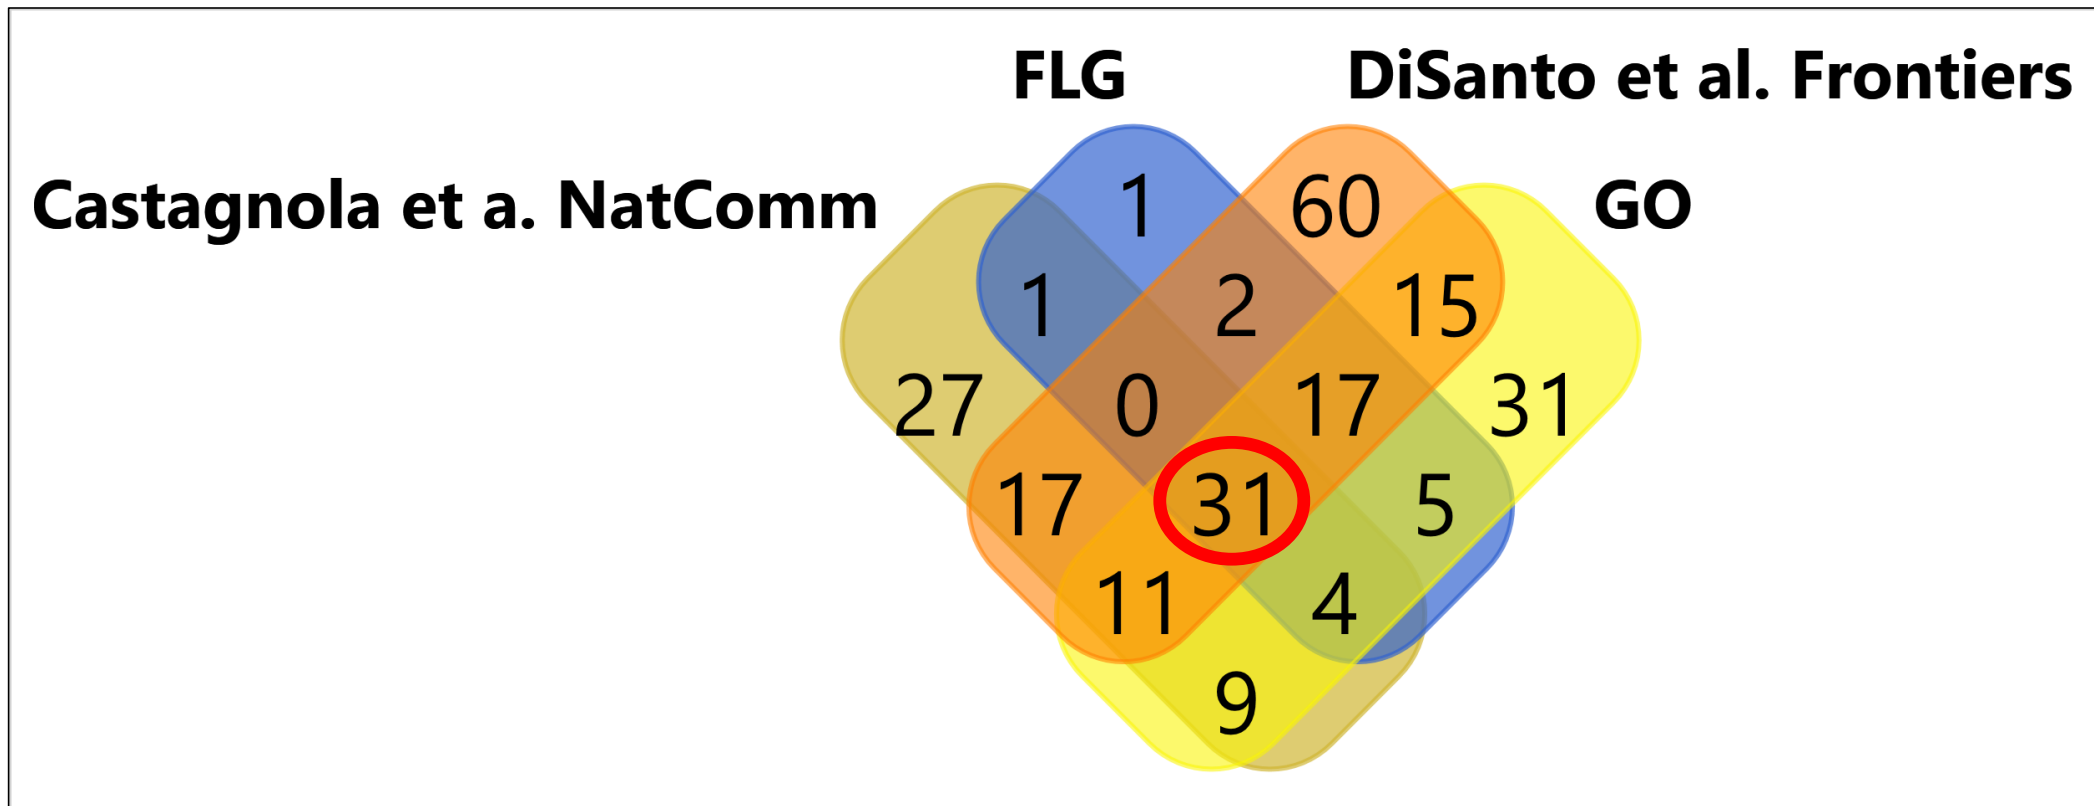

**Figure S6.** Comparison of the protein corona composition data generated by our work with data from two other papers published (Castagnola et al. *Nat.Comm.* 2018 and Di Santo et al. *Front.Bioeng.Biotechnol.* 2020). Venn overlap is reported for all the four studies together.

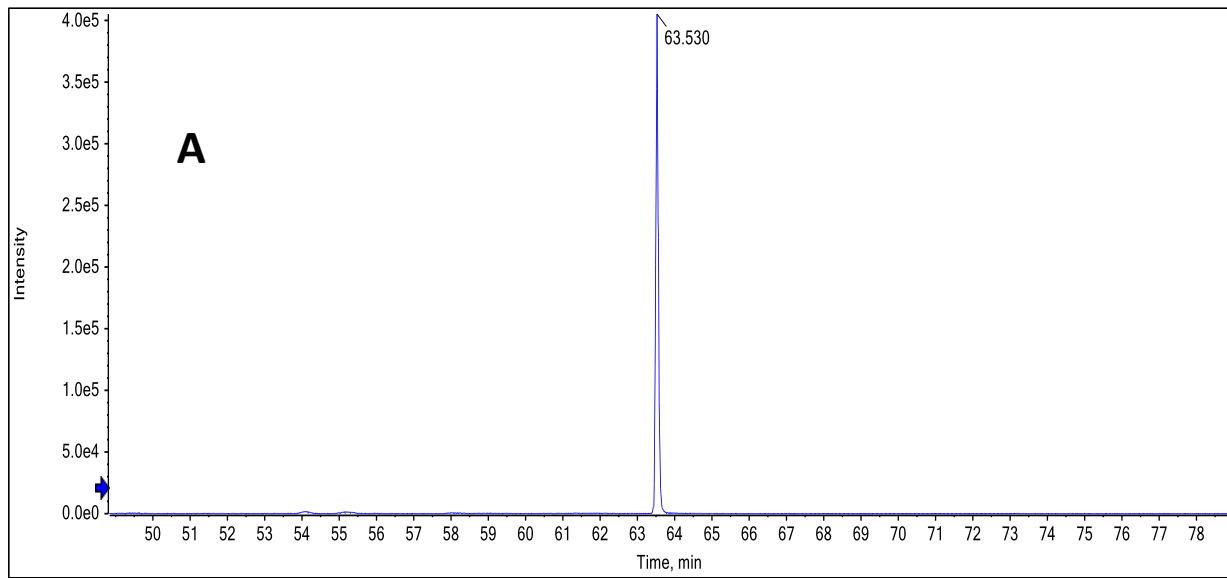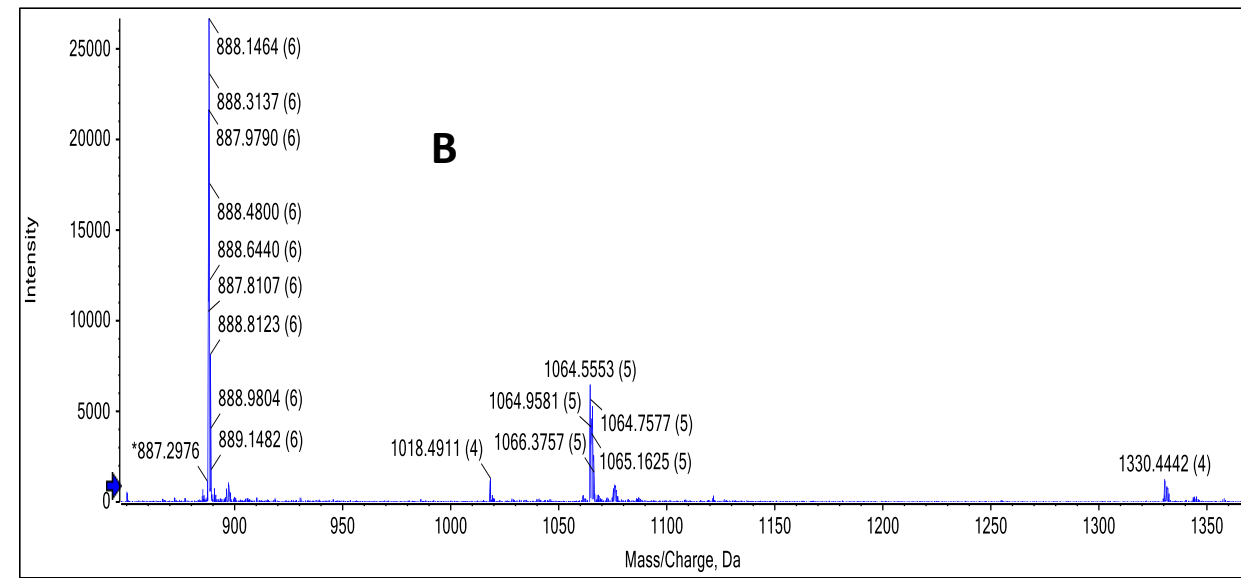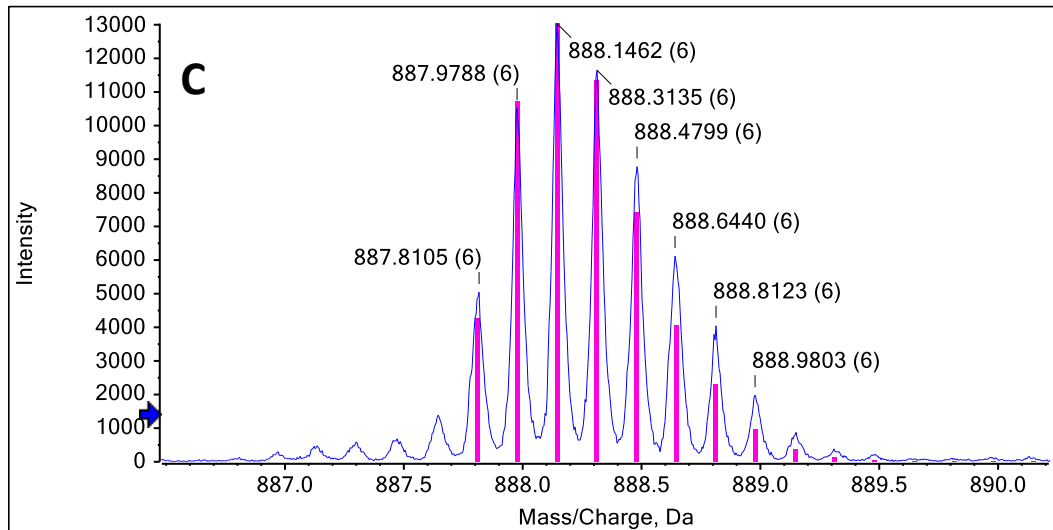

**Figure S7:** A) extracted ion current of charge state 6+ of peptide QEM(Ox)SK\*DLEEVK\*AK\*VQPYLDD FQK\*K\*WQEEMELYR, with \* indicating TMT tags. B) full scan mass spectrum of the peptide. C) overlapped isotopic distribution of the peptide calculated for charge state 6+ (pink) with experimental one (blue).

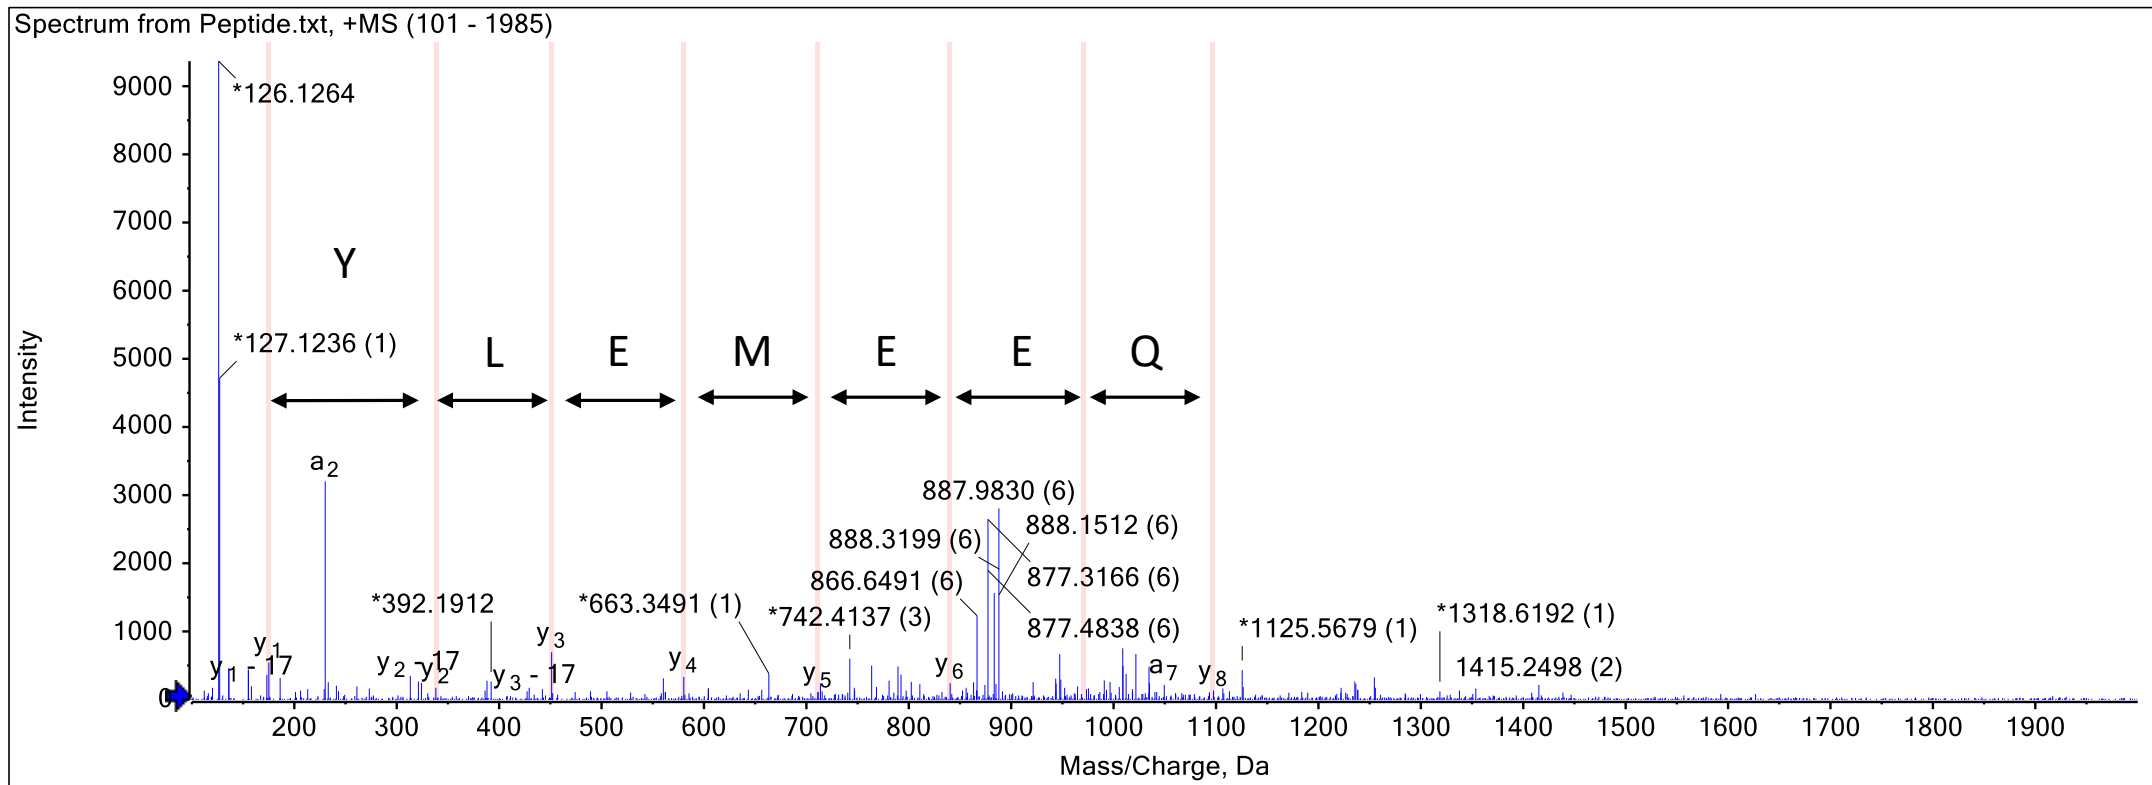

**Figure S8:** MS/MS spectrum of charge state 6+ of peptide QEM(O<sub>x</sub>)SK\*DLEEVK\*AK\*VQPYLDDFQK\*K\* WQEEMELYR, with \* indicating TMT tags. The peptide was confirmed through the y<sub>1</sub>-y<sub>8</sub> series, corresponding to sequence QEEMELYR (unique to ApoA1 in *Homo Sapiens*)



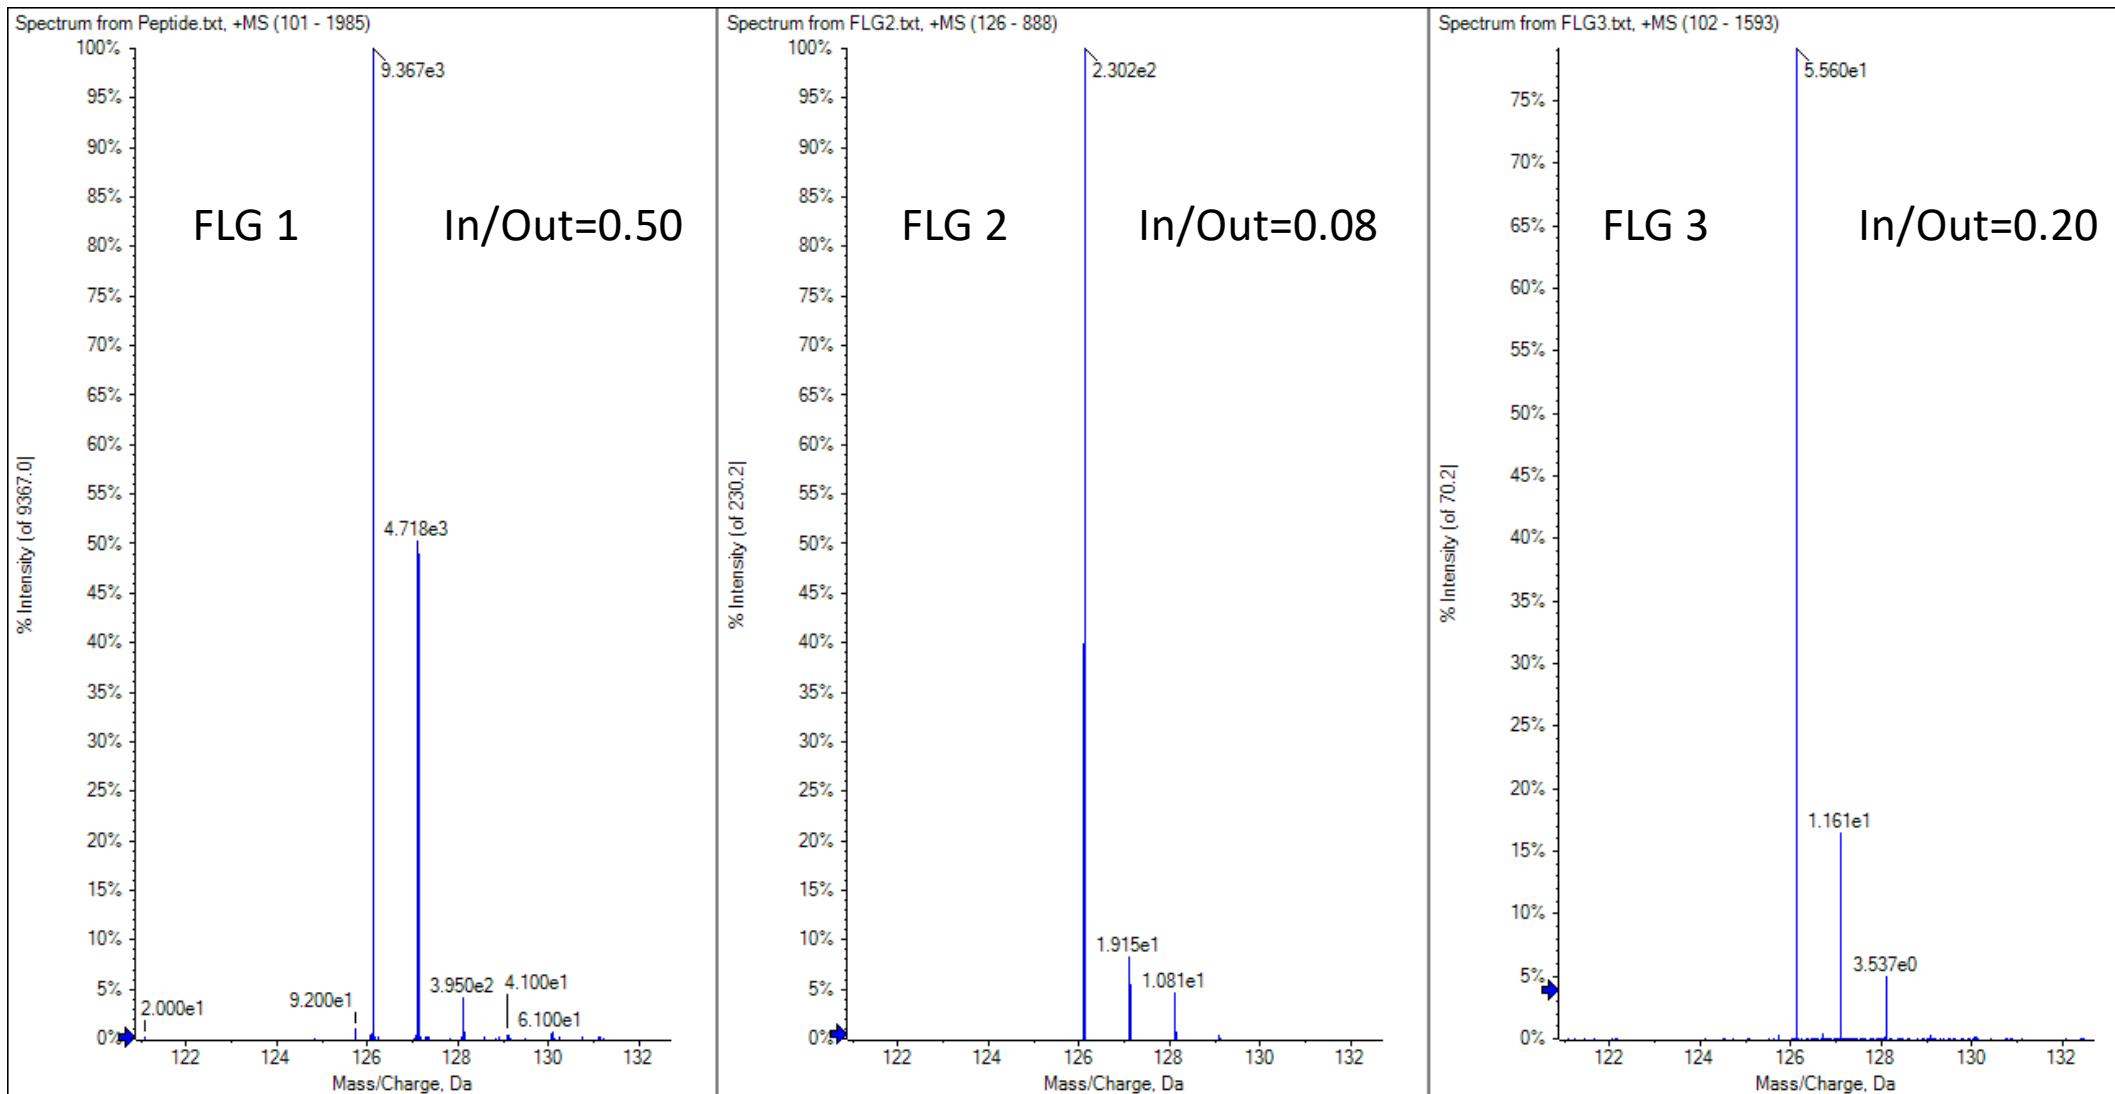

**Figure S9:** In/Out ratio of the MS/MS spectrum of charge state 6+ of peptide QEM(Ox)SK\*DLEEVK\*AK\*VQPYLDD FQK\*K\*WQEEMELYR (with \* indicating TMT tags) for the three FLG samples.
